# Supplementary material for: Ultraviolet radiation exposure and melanoma: evidence for gene-environment interaction in a large prospective cohort
Source: bioRxiv or medRxiv preprint supplement (doi:10.1101/666123), 2019-06-14
Supplement: Supplementary file [file media-1.pdf]

## SUPPLEMENTARY METHODS

### Calculation of polygenic risk score

We calculated a polygenic risk score (PRS) for 15,373 participants who were eligible for these analyses (39.6%) and had GWAS data available. The PRS was calculated using summary statistics from a melanoma GWAS meta-analysis for 12,874 cases and 23,203 controls.<sup>1</sup>

Consistent with the meta-analysis,<sup>1</sup> the PRS included only SNPs with an imputation quality score (RSQ or INFO) 0.8, MAF > 0.001 and present in 2 or more studies; the QSkin cohort was not included in the meta-analysis.

Linkage Disequilibrium (LD) between the meta-analysis SNPs was determined using a reference panel generated from 5,000 White British individuals from the UK Biobank (Application ID 25331). UK Biobank samples' HRC v1 imputed data was filtered to those with an imputation quality RSQ > 0.3, a Hardy-Weinberg P-value >  $1 \times 10^{-6}$  and missingness < 0.03, and then converted to best guess genotypes.

Using the intersection of the available, cleaned SNPs for the QSkin GWAS data, the melanoma meta-analysis, and the UK Biobank LD panel, this overlapping set of SNPs was pruned (LD  $r^2$  threshold < 0.025 over a 10 megabase window) to 123,038 independent SNPs unselected for melanoma P-value using PLINK v1.90b6.6.<sup>2</sup> Due to the strong cutaneous melanoma association at the *MC1R* on chromosome 16, even at the very strict LD  $r^2$  threshold of 0.025 multiple additional SNPs were present post pruning near *MC1R*, each with LD  $r^2$  0.01-0.02 with *MC1R* red hair alleles. To address this, the terminal 5 megabases of chromosome 16 was removed from

the pruned set of SNPs, and instead the 7 *MC1R* missense alleles passing QC across all sets (those strongly associated with melanoma, red hair and pigmentation<sup>3</sup> termed 'R' alleles rs1805006 ASP84GLU, rs1805007 ARG151CYS, rs1110400 I155T, rs1805008 ARG160TRP, and less strongly associated 'r' allele rs1805005 VAL60LEU, rs2228479 VAL92MET, rs885479 R163Q were retained for this region.

PRS scores were generated by the --score function of PLINK v1.9, which sums the log(OR) of the fixed effects meta-analysis for each copy of the effect allele, with the non-effect allele scored 0. To determine the most powerful set of SNPs 10 scores were constructed using different fixed effects meta-analysis p-value bins (S1  $0-5 \times 10^{-8}$ ; S2  $0-5 \times 10^{-7}$ ; S3  $0-5 \times 10^{-6}$ ; S4  $0-5 \times 10^{-5}$ ; S5  $0.5 \times 10^{-4}$ ; S6  $0-5 \times 10^{-3}$ ; S7 0-0.01; S8 0-0.05; S9 0-0.10; S10 0-1). PRS P-value bins were assessed by their goodness of fit using nagelkerke psuedo-R2 when regressed onto QSkin melanoma status using logistic regression together with the first 10 principal components from the PCA analysis used to exclude population outliers in R v3.5.1.<sup>4</sup> Bin 2 ( $0 < P < 5 \times 10^{-7}$ ) achieved the highest goodness of fit, and included 28 independent SNPs (Appendix 1).

**Appendix 1.** SNPs used in calculation of polygenic risk for melanoma.

| CHR | BP        | SNP         | EA | NEA | BETA      | P         | AF_HRC    |
|-----|-----------|-------------|----|-----|-----------|-----------|-----------|
| 1   | 150856153 | rs12410869  | T  | G   | -0.13045  | 5.21E-013 | 0.380259  |
| 1   | 226608104 | rs1858550   | A  | C   | -0.142601 | 1.68E-013 | 0.370034  |
|     |           |             |    |     | -         |           |           |
| 2   | 38276549  | rs6750047   | G  | A   | 0.0883942 | 2.92E-007 | 0.541099  |
| 2   | 202176294 | rs7582362   | G  | A   | -0.113169 | 8.88E-009 | 0.719002  |
| 5   | 1320247   | rs380286    | A  | G   | 0.151519  | 1.66E-017 | 0.446628  |
| 5   | 33952378  | rs250417    | C  | G   | 0.890645  | 2.30E-012 | 0.926748  |
| 6   | 21163919  | rs6914598   | C  | T   | 0.108226  | 2.56E-008 | 0.317324  |
| 7   | 16984280  | rs1636744   | T  | C   | 0.105441  | 1.84E-009 | 0.382676  |
| 7   | 130754812 | rs4731742   | C  | G   | 0.11805   | 4.29E-007 | 0.752587  |
| 8   | 37482669  | rs56122426  | A  | G   | -0.156186 | 2.04E-007 | 0.160132  |
| 9   | 21803183  | rs935055    | C  | G   | -0.213812 | 2.65E-032 | 0.523576  |
| 9   | 22060833  | rs77283072  | A  | G   | 0.136714  | 3.75E-009 | 0.171928  |
| 9   | 109060830 | rs10739221  | C  | T   | -0.119798 | 9.58E-009 | 0.740838  |
|     |           |             |    |     | -         |           |           |
| 9   | 110698716 | rs7041168   | T  | G   | 0.0957403 | 1.31E-007 | 0.512766  |
| 11  | 68919649  | rs2290419   | G  | A   | -0.201382 | 4.20E-007 | 0.0576378 |
| 11  | 69367118  | rs498136    | C  | A   | -0.115748 | 1.01E-010 | 0.640407  |
| 11  | 89028043  | rs10830253  | G  | T   | 0.194003  | 1.01E-026 | 0.295981  |
| 11  | 108187689 | rs73008229  | A  | G   | -0.188259 | 1.38E-012 | 0.144472  |
| 12  | 13075202  | rs2111398   | G  | A   | 0.097036  | 3.68E-007 | 0.437512  |
| 14  | 91185865  | rs184628474 | A  | G   | -1.03282  | 4.63E-014 | 0.03919   |
| 15  | 28335820  | rs4778138   | G  | A   | -0.177692 | 3.11E-009 | 0.180582  |
| 16  | 54115829  | rs12596638  | A  | G   | 0.142887  | 1.81E-009 | 0.178596  |
| 16  | 68796746  | rs35158985  | G  | A   | 0.101383  | 1.31E-007 | 0.327903  |
| 16  | 89986117  | rs1805007   | T  | C   | 0.615186  | 4.68E-083 | 0.0634586 |
| 16  | 89986144  | rs1805008   | T  | C   | 0.316707  | 6.26E-025 | 0.0663536 |
| 20  | 32538391  | rs62211989  | C  | G   | 0.350446  | 1.63E-030 | 0.0576994 |
| 21  | 42743496  | rs408825    | T  | C   | 0.140718  | 3.21E-015 | 0.586834  |
| 22  | 38545942  | rs132941    | C  | T   | -0.123072 | 1.61E-012 | 0.451078  |

Melanoma risk effect size from a melanoma GWAS meta-analysis,<sup>1</sup> and are the log of the odds ratio (BETA) for the effect allele (EA). For reference we also report the hg19 chromosome (CHR) and base pair (BP) position, the non-effect allele (NEA), the fixed effects meta-analysis p-value (P), and the effect allele frequency from the Haplotype Reference Consortium.<sup>5</sup>

**Table S1.** Measures of sun exposure and risk of invasive melanoma (*in situ* melanomas occurring during follow-up are censored).

| Variables                                                   | Invasive melanoma      |                      | HR (95%CI) <sup>1</sup> |
|-------------------------------------------------------------|------------------------|----------------------|-------------------------|
|                                                             | No (n=38,529)<br>n (%) | Yes (n=303)<br>n (%) |                         |
| <b>Born in Australia</b>                                    |                        |                      |                         |
| No                                                          | 6783 (17.6)            | 40 (13.2)            | Reference               |
| Yes                                                         | 31,746 (82.4)          | 263 (86.8)           | 1.50 (1.08-2.10)        |
| <b>Latitude of birth</b>                                    |                        |                      |                         |
| ≥45° S/N                                                    | 4504 (11.7)            | 25 (8.3)             | Reference               |
| <45° S/N                                                    | 34,025 (88.3)          | 278 (91.8)           | 1.62 (1.07-2.43)        |
| <b>Region of Australia lived longest up to age 20 years</b> |                        |                      |                         |
| Southern region                                             | 11,651 (33.7)          | 96 (33.9)            | Reference               |
| Central region                                              | 17,039 (49.4)          | 153 (54.1)           | 1.15 (0.89-1.48)        |
| Northern region                                             | 5816 (16.8)            | 34 (12.0)            | 0.76 (0.51-1.12)        |
| <b>Region of Australia lived longest over lifetime</b>      |                        |                      |                         |
| Southern region                                             | 8779 (22.8)            | 71 (23.4)            | Reference               |
| Central region                                              | 22,907 (55.5)          | 194 (64.0)           | 1.06 (0.81-1.39)        |
| Northern region                                             | 6843 (17.8)            | 38 (12.5)            | 0.70 (0.47-1.03)        |
| <b>Age moved to Australia</b>                               |                        |                      |                         |
| Born in Australia                                           | 31,786 (82.5)          | 263 (86.8)           | Reference               |
| 1-10 years                                                  | 1875 (4.9)             | 11 (3.6)             | 0.70 (0.38-1.27)        |
| 11-20 years                                                 | 1092 (2.8)             | 12 (4.0)             | 1.24 (0.69-2.21)        |
| 20+ years                                                   | 3776 (9.8)             | 17 (5.6)             | 0.50 (0.30-0.81)        |
| <b>Sunburns as a child (less than 10 years)</b>             |                        |                      |                         |
| Never                                                       | 8082 (21.0)            | 57 (18.8)            | Reference               |
| 1-5 times                                                   | 17,588 (45.6)          | 143 (47.2)           | 1.02 (0.74-1.40)        |
| 6-10 times                                                  | 6733 (17.5)            | 53 (17.5)            | 0.92 (0.62-1.38)        |
| 11-20 times                                                 | 3643 (9.5)             | 22 (7.3)             | 0.79 (0.47-1.31)        |
| 21-50 times                                                 | 1748 (4.5)             | 15 (5.0)             | 1.01 (0.57-1.81)        |
| >50 times                                                   | 735 (1.9)              | 13 (4.3)             | 1.83 (0.96-3.48)        |
| <b>Sunburns as a youth (10-20 years old)</b>                |                        |                      |                         |
| Never                                                       | 1788 (4.6)             | 9 (3.0)              | Reference               |
| 1-5 times                                                   | 16,799 (43.6)          | 127 (41.9)           | 1.55 (0.77-3.14)        |
| 6-10 times                                                  | 9582 (24.9)            | 80 (26.4)            | 1.73 (0.85-3.55)        |
| 11-20 times                                                 | 6420 (16.7)            | 49 (16.2)            | 1.55 (0.74-3.23)        |
| 21-50 times                                                 | 2887 (7.5)             | 20 (6.6)             | 1.42 (0.63-3.21)        |
| >50 times                                                   | 1053 (2.7)             | 18 (5.9)             | 3.13 (1.35-7.25)        |
| <b>Sunburns as an adult (more than 20 years old)</b>        |                        |                      |                         |
| Never                                                       | 6231 (16.2)            | 40 (13.2)            | Reference               |
| 1-5 times                                                   | 20,465 (53.1)          | 160 (52.8)           | 1.39 (0.97-1.99)        |
| 6-10 times                                                  | 6398 (16.6)            | 55 (18.2)            | 1.50 (0.98-2.28)        |
| 11-20 times                                                 | 3415 (8.9)             | 20 (6.6)             | 1.03 (0.59-1.77)        |
| 21-50 times                                                 | 1462 (3.8)             | 22 (7.3)             | 2.45 (1.44-4.17)        |

| Variables                                                             | Invasive melanoma |             | HR (95%CI) <sup>1</sup> |
|-----------------------------------------------------------------------|-------------------|-------------|-------------------------|
|                                                                       | No (n=38,529)     | Yes (n=303) |                         |
|                                                                       | n (%)             | n (%)       |                         |
| >50 times                                                             | 558 (1.5)         | 6 (2.0)     | 1.70 (0.71-4.06)        |
| <b>Cumulative sun exposure<sup>2</sup></b>                            |                   |             |                         |
| Q1                                                                    | 9344 (24.3)       | 69 (22.8)   | Reference               |
| Q2                                                                    | 9676 (25.1)       | 66 (21.8)   | 0.87 (0.62-1.23)        |
| Q3                                                                    | 9729 (25.3)       | 84 (27.7)   | 0.97 (0.69-1.35)        |
| Q4                                                                    | 9781 (25.4)       | 84 (27.7)   | 0.83 (0.59-1.18)        |
| <b>Average number of hours in the sun on weekdays<sup>2</sup></b>     |                   |             |                         |
| Q1                                                                    | 9033 (23.4)       | 71 (23.4)   | Reference               |
| Q2                                                                    | 9446 (24.5)       | 73 (24.1)   | 1.00 (0.71-1.40)        |
| Q3                                                                    | 10,156 (26.4)     | 80 (26.4)   | 0.93 (0.67-1.29)        |
| Q4                                                                    | 9894 (25.7)       | 79 (26.1)   | 0.86 (0.61-1.20)        |
| <b>Average number of hours in the sun on weekend days<sup>2</sup></b> |                   |             |                         |
| Q1                                                                    | 9695 (25.2)       | 76 (25.1)   | Reference               |
| Q2                                                                    | 9860 (25.6)       | 81 (26.7)   | 1.04 (0.74-1.45)        |
| Q3                                                                    | 9780 (25.4)       | 69 (22.8)   | 0.91 (0.65-1.27)        |
| Q4                                                                    | 9194 (23.9)       | 77 (25.4)   | 1.02 (0.72-1.44)        |
| <b>Sunbed use</b>                                                     |                   |             |                         |
| Never                                                                 | 34,413 (89.3)     | 273 (90.1)  | Reference               |
| Ever                                                                  | 4116 (10.7)       | 30 (9.9)    | 1.31 (0.89-1.92)        |
| <b>Number of skin cancers excised</b>                                 |                   |             |                         |
| None                                                                  | 23,540 (61.1)     | 118 (38.9)  | Reference               |
| 1                                                                     | 5368 (13.9)       | 45 (14.9)   | 1.48 (1.04-2.10)        |
| 2-10                                                                  | 8055 (20.9)       | 106 (25.0)  | 2.03 (1.54-2.68)        |
| 10-20                                                                 | 942 (2.4)         | 21 (6.9)    | 2.86 (1.75-4.67)        |
| 20+                                                                   | 624 (1.6)         | 13 (4.3)    | 2.40 (1.33-4.34)        |
| <b>Number of actinic lesions burnt/frozen off</b>                     |                   |             |                         |
| None                                                                  | 17,311 (44.9)     | 68 (22.4)   | Reference               |
| 1-5                                                                   | 10,429 (27.1)     | 80 (26.4)   | 1.76 (1.27-2.43)        |
| 6-10                                                                  | 3672 (9.5)        | 37 (12.2)   | 2.02 (1.34-3.05)        |
| 11-20                                                                 | 2963 (7.7)        | 39 (12.9)   | 2.46 (1.64-3.68)        |
| 21-50                                                                 | 2263 (5.9)        | 41 (13.5)   | 3.10 (2.08-4.64)        |
| 50+                                                                   | 1891 (4.9)        | 38 (12.5)   | 3.05 (1.97-4.71)        |

<sup>1</sup>Born in Australia, latitude of birth, region of Australia lived longest (as a child; lifetime) adjusted for age and sex.

All other variables adjusted for age, sex, hair colour and tanning ability.

<sup>2</sup>Q - Quartile

**Table S2.** Measures of sun exposure and risk of invasive melanoma (*in situ* melanomas treated as a time-varying covariate).

| Variables                                                        | Invasive melanoma      |                      | HR (95%CI) <sup>1</sup> |
|------------------------------------------------------------------|------------------------|----------------------|-------------------------|
|                                                                  | No (n=39,816)<br>n (%) | Yes (n=346)<br>n (%) |                         |
| <b>Born in Australia</b>                                         |                        |                      |                         |
| No                                                               | 6942 (17.5)            | 43 (12.4)            | Reference               |
| Yes                                                              | 32,836 (82.6)          | 303 (87.6)           | 1.59 (1.16-2.20)        |
| <b>Latitude of birth</b>                                         |                        |                      |                         |
| ≥45° S/N                                                         | 4591 (11.5)            | 27 (7.8)             | Reference               |
| <45° S/N                                                         | 35,174 (88.5)          | 319 (92.2)           | 1.69 (1.14-2.51)        |
| <b>Region of Australia lived longest up to age 20 years</b>      |                        |                      |                         |
| Southern region                                                  | 11,773 (34.2)          | 105 (33.1)           | Reference               |
| Central region                                                   | 16,944 (49.1)          | 173 (54.6)           | 1.19 (0.93-1.51)        |
| Northern region                                                  | 5757 (16.7)            | 39 (12.3)            | 0.80 (0.56-1.16)        |
| <b>Region of Australia lived longest over lifetime</b>           |                        |                      |                         |
| Southern region                                                  | 8602 (22.2)            | 74 (21.9)            | Reference               |
| Central region                                                   | 23,206 (60.0)          | 218 (64.5)           | 1.12 (0.86-1.45)        |
| Northern region                                                  | 6905 (17.8)            | 46 (13.6)            | 0.79 (0.54-1.14)        |
| <b>Age moved to Australia</b>                                    |                        |                      |                         |
| Born in Australia                                                | 32,836 (82.8)          | 303 (87.6)           | Reference               |
| 1-10 years                                                       | 1877 (4.7)             | 13 (3.8)             | 0.74 (0.42-1.28)        |
| 11-20 years                                                      | 1111 (2.8)             | 12 (3.5)             | 1.10 (0.62-1.96)        |
| 20+ years                                                        | 3834 (9.7)             | 18 (5.2)             | 0.47 (0.29-0.75)        |
| <b>Sunburns as a child (less than 10 years)</b>                  |                        |                      |                         |
| Never                                                            | 7417 (20.6)            | 57 (18.2)            | Reference               |
| 1-5 times                                                        | 16,401 (45.5)          | 147 (46.8)           | 1.10 (0.82-1.51)        |
| 6-10 times                                                       | 6445 (17.9)            | 52 (16.6)            | 1.00 (0.68-1.47)        |
| 11-20 times                                                      | 3551 (9.9)             | 30 (9.6)             | 1.02 (0.65-1.61)        |
| 21-50 times                                                      | 1594 (4.4)             | 17 (5.4)             | 1.23 (0.71-2.15)        |
| >50 times                                                        | 1058 (2.8)             | 11 (3.5)             | 1.67 (0.84-3.32)        |
| <b>Sunburns as a youth (10-20 years old)</b>                     |                        |                      |                         |
| Never                                                            | 1679 (4.4)             | 8 (3.4)              | Reference               |
| 1-5 times                                                        | 16,677 (43.3)          | 144 (42.9)           | 1.80 (0.88-3.67)        |
| 6-10 times                                                       | 9671 (25.1)            | 83 (24.7)            | 1.85 (0.89-3.84)        |
| 11-20 times                                                      | 6513 (16.9)            | 56 (16.7)            | 1.86 (0.88-3.91)        |
| 21-50 times                                                      | 2895 (7.5)             | 24 (7.1)             | 1.73 (0.77-3.90)        |
| >50 times                                                        | 1054 (2.7)             | 21 (6.3)             | 4.19 (1.84-9.55)        |
| <b>Sunburns as an adult (more than 20 years old)<sup>2</sup></b> |                        |                      |                         |
| Never                                                            | 6086 (16.0)            | 44 (13.3)            | Reference               |
| 1-5 times                                                        | 20,106 (52.9)          | 166 (50.0)           | 1.28 (0.91-1.79)        |
| 6-10 times                                                       | 6415 (16.9)            | 61 (18.4)            | 1.55 (1.05-2.29)        |
| 11-20 times                                                      | 3446 (9.1)             | 30 (9.0)             | 1.41 (0.89-2.25)        |
| 21-50 times                                                      | 1433 (3.8)             | 24 (7.2)             | 2.65 (1.61-4.38)        |

| Variables                                                             | Invasive melanoma |             | HR (95%CI) <sup>1</sup> |
|-----------------------------------------------------------------------|-------------------|-------------|-------------------------|
|                                                                       | No (n=39,816)     | Yes (n=346) |                         |
|                                                                       | n (%)             | n (%)       |                         |
| >50 times                                                             | 537 (1.4)         | 7 (2.1)     | 2.07 (0.93-4.62)        |
| <b>Cumulative sun exposure</b>                                        |                   |             |                         |
| Q1                                                                    | 8495 (24.7)       | 68 (23.6)   | Reference               |
| Q2                                                                    | 8641 (25.1)       | 60 (20.8)   | 0.88 (0.62-1.24)        |
| Q3                                                                    | 8582 (25.0)       | 72 (25.0)   | 0.99 (0.70-1.39)        |
| Q4                                                                    | 8659 (25.2)       | 88 (30.6)   | 1.16 (0.84-1.61)        |
| <b>Average number of hours in the sun on weekdays<sup>2</sup></b>     |                   |             |                         |
| Q1                                                                    | 8500 (23.8)       | 68 (23.1)   | Reference               |
| Q2                                                                    | 8775 (24.6)       | 74 (25.1)   | 1.09 (0.78-1.52)        |
| Q3                                                                    | 9389 (26.3)       | 72 (24.4)   | 0.99 (0.71-1.38)        |
| Q4                                                                    | 9055 (25.4)       | 81 (27.5)   | 1.19 (0.86-1.65)        |
| <b>Average number of hours in the sun on weekend days<sup>2</sup></b> |                   |             |                         |
| Q1                                                                    | 8853 (24.7)       | 74 (24.3)   | Reference               |
| Q2                                                                    | 9092 (25.4)       | 73 (23.9)   | 1.07 (0.77-1.48)        |
| Q3                                                                    | 9223 (25.7)       | 81 (26.6)   | 1.23 (0.90-1.69)        |
| Q4                                                                    | 8699 (24.3)       | 77 (25.3)   | 1.32 (0.95-1.82)        |
| <b>Sunbed use</b>                                                     |                   |             |                         |
| Never                                                                 | 35,360 (89.4)     | 312 (90.7)  | Reference               |
| Ever                                                                  | 4200 (10.6)       | 32 (9.3)    | 1.12 (0.78-1.62)        |
| <b>Number of skin cancers excised</b>                                 |                   |             |                         |
| None                                                                  | 23,637 (59.8)     | 123 (35.8)  | Reference               |
| 1                                                                     | 5607 (14.2)       | 51 (14.8)   | 1.57 (1.13-2.19)        |
| 2-10                                                                  | 8565 (21.7)       | 127 (36.9)  | 2.27 (1.75-2.95)        |
| 10-20                                                                 | 1029 (2.6)        | 24 (7.0)    | 2.91 (1.81-4.69)        |
| 20+                                                                   | 677 (1.7)         | 19 (5.5)    | 3.34 (2.00-5.59)        |
| <b>Number of actinic lesions burnt/frozen off</b>                     |                   |             |                         |
| None                                                                  | 17,500 (44.2)     | 73 (21.2)   | Reference               |
| 1-5                                                                   | 10,708 (27.0)     | 84 (24.4)   | 1.65 (1.20-2.26)        |
| 6-10                                                                  | 3820 (9.6)        | 44 (12.8)   | 2.18 (1.48-3.20)        |
| 11-20                                                                 | 3114 (7.9)        | 46 (13.3)   | 2.63 (1.81-3.84)        |
| 21-50                                                                 | 2440 (6.2)        | 48 (13.9)   | 3.16 (2.16-4.64)        |
| 50+                                                                   | 2032 (5.1)        | 50 (14.5)   | 3.64 (2.45-5.41)        |

<sup>1</sup>Born in Australia, latitude of birth, region of Australia lived longest (as a child; lifetime) adjusted for age and sex.

All other variables adjusted for age, sex, hair colour and tanning ability.

<sup>2</sup>Q - Quartile

**Table S3.** Characteristics of entire cohort (n=38,832) and stratified by PRS availability.

| <b>Characteristic</b>              | <b>Whole cohort<br/>(n=38,832)<br/>N (%)<sup>a</sup></b> | <b>Without PRS<br/>(n=23,459)<br/>N (%)<sup>a</sup></b> | <b>With PRS<br/>(n=15,373)<br/>N (%)<sup>a</sup></b> | <b>Chi-Square P-<br/>value</b> |
|------------------------------------|----------------------------------------------------------|---------------------------------------------------------|------------------------------------------------------|--------------------------------|
| <b>Age</b>                         |                                                          |                                                         |                                                      |                                |
| 40-49                              | 10,278 (26.5)                                            | 6928 (29.5)                                             | 3350 (21.8)                                          |                                |
| 50-59                              | 14,724 (37.9)                                            | 8698 (37.1)                                             | 6026 (39.2)                                          |                                |
| ≥60                                | 13,830 (35.6)                                            | 7833 (33.4)                                             | 5997 (39.0)                                          | <0.001                         |
| <b>Mean age (SD)</b>               | 56.0 (8.2)                                               | 56.9 (7.9)                                              | 55.5 (8.3)                                           | <0.001 <sup>1</sup>            |
| <b>Sex</b>                         |                                                          |                                                         |                                                      |                                |
| Female                             | 21,067 (54.3)                                            | 12,632 (53.8)                                           | 8435 (54.9)                                          |                                |
| Male                               | 17,765 (45.7)                                            | 10,827 (46.2)                                           | 6938 (45.1)                                          | 0.05                           |
| <b>Education</b>                   |                                                          |                                                         |                                                      |                                |
| No school                          | 3286 (8.5)                                               | 2313 (9.9)                                              | 973 (6.3)                                            |                                |
| School or intermediate             | 6532 (16.8)                                              | 4148 (17.7)                                             | 2384 (15.5)                                          |                                |
| High school                        | 7641 (19.7)                                              | 4775 (20.4)                                             | 2866 (18.6)                                          |                                |
| Trade/apprenticeship               | 4007 (10.3)                                              | 2564 (10.9)                                             | 1443 (9.4)                                           |                                |
| Certificate/diploma                | 7730 (19.9)                                              | 4482 (19.1)                                             | 3248 (21.1)                                          |                                |
| University                         | 9636 (24.8)                                              | 5177 (22.1)                                             | 4459 (29.0)                                          | <0.001                         |
| <b>Private health insurance</b>    |                                                          |                                                         |                                                      |                                |
| Yes                                | 26,176 (67.4)                                            | 15,138 (64.5)                                           | 11,038 (71.8)                                        |                                |
| No                                 | 12,656 (32.6)                                            | 8321 (35.5)                                             | 4335 (28.2)                                          | <0.001                         |
| <b>Native born</b>                 |                                                          |                                                         |                                                      |                                |
| Yes                                | 32,009 (82.4)                                            | 19,302 (82.3)                                           | 12,707 (82.7)                                        |                                |
| No                                 | 6823 (17.6)                                              | 4157 (17.7)                                             | 2666 (17.3)                                          | 0.34                           |
| <b>Skin colour</b>                 |                                                          |                                                         |                                                      |                                |
| Fair                               | 23,695 (61.0)                                            | 13,963 (59.5)                                           | 9732 (63.3)                                          |                                |
| Medium                             | 12,554 (32.3)                                            | 7777 (33.2)                                             | 4777 (31.1)                                          |                                |
| Olive/dark                         | 2583 (6.7)                                               | 1719 (7.3)                                              | 864 (5.6)                                            | <0.001                         |
| <b>Skin tanning ability</b>        |                                                          |                                                         |                                                      |                                |
| Not tan                            | 2536 (6.5)                                               | 1519 (6.5)                                              | 1017 (6.6)                                           |                                |
| Tan a little                       | 8187 (21.1)                                              | 4762 (20.3)                                             | 3425 (22.3)                                          |                                |
| Tan moderately                     | 19,448 (50.1)                                            | 11,752 (50.1)                                           | 7696 (50.1)                                          |                                |
| Tan deeply                         | 8661 (22.3)                                              | 5426 (23.1)                                             | 3235 (21.0)                                          | <0.001                         |
| <b>Hair colour</b>                 |                                                          |                                                         |                                                      |                                |
| Red/Auburn                         | 2263 (5.8)                                               | 1361 (5.8)                                              | 902 (5.9)                                            |                                |
| Dark brown                         | 13,071 (33.7)                                            | 7890 (33.6)                                             | 5181 (33.7)                                          |                                |
| Blond                              | 5602 (14.4)                                              | 3456 (14.7)                                             | 2146 (14.0)                                          |                                |
| Black                              | 3044 (7.8)                                               | 1854 (7.9)                                              | 1190 (7.7)                                           |                                |
| Light brown                        | 14,852 (38.2)                                            | 8898 (37.9)                                             | 5954 (38.7)                                          | 0.22                           |
| <b>Freckling on face at age 21</b> |                                                          |                                                         |                                                      |                                |
| None                               | 18,039 (46.5)                                            | 11,122 (47.4)                                           | 6917 (45.0)                                          |                                |
| A few                              | 12,276 (31.6)                                            | 7360 (31.4)                                             | 4916 (32.0)                                          |                                |
| Some                               | 6136 (15.8)                                              | 3598 (15.3)                                             | 2538 (16.5)                                          |                                |
| Many                               | 2381 (6.1)                                               | 1379 (5.9)                                              | 1002 (6.5)                                           | <0.001                         |
| <b>Moles at age 21</b>             |                                                          |                                                         |                                                      |                                |
| None                               | 11,100 (28.6)                                            | 6902 (29.4)                                             | 4198 (27.3)                                          |                                |
| A few                              | 20,709 (53.3)                                            | 12,338 (52.6)                                           | 8371 (54.5)                                          |                                |



| <b>Characteristic</b>                             | <b>Whole cohort</b><br>(n=38,832)<br><b>N (%)<sup>a</sup></b> | <b>Without PRS</b><br>(n=23,459)<br><b>N (%)<sup>a</sup></b> | <b>With PRS</b><br>(n=15,373)<br><b>N (%)<sup>a</sup></b> | <b>Chi-Square P-value</b> |
|---------------------------------------------------|---------------------------------------------------------------|--------------------------------------------------------------|-----------------------------------------------------------|---------------------------|
| Some                                              | 5846 (15.1)                                                   | 3546 (15.1)                                                  | 2300 (15.0)                                               | <0.001                    |
| Many                                              | 1177 (3.0)                                                    | 673 (2.9)                                                    | 504 (3.3)                                                 |                           |
| <b>Sunburns as an adult</b>                       |                                                               |                                                              |                                                           |                           |
| Never                                             | 6271 (16.1)                                                   | 3800 (16.2)                                                  | 2471 (16.1)                                               | 0.09                      |
| 1-5 times                                         | 20,625 (53.1)                                                 | 12,361 (52.7)                                                | 8264 (53.8)                                               |                           |
| 6-10 times                                        | 6453 (16.6)                                                   | 3910 (16.7)                                                  | 2543 (16.5)                                               |                           |
| 11-20 times                                       | 3435 (8.8)                                                    | 2094 (8.9)                                                   | 1341 (8.7)                                                |                           |
| 21-50 times                                       | 1484 (3.8)                                                    | 932 (4.0)                                                    | 552 (3.6)                                                 |                           |
| >50 times                                         | 564 (1.5)                                                     | 362 (1.5)                                                    | 202 (1.3)                                                 |                           |
| <b>Number of skin cancers excised</b>             |                                                               |                                                              |                                                           |                           |
| None                                              | 23,658 (60.9)                                                 | 14,742 (62.8)                                                | 8916 (58.0)                                               | <0.001                    |
| 1                                                 | 5413 (13.9)                                                   | 2161 (13.7)                                                  | 3252 (14.1)                                               |                           |
| 2-10                                              | 8161 (21.0)                                                   | 4553 (19.4)                                                  | 3608 (23.5)                                               |                           |
| 11-20                                             | 963 (2.5)                                                     | 518 (2.2)                                                    | 445 (2.9)                                                 |                           |
| 20+                                               | 637 (1.6)                                                     | 336 (1.4)                                                    | 301 (2.0)                                                 |                           |
| <b>Number of actinic lesions burnt/frozen off</b> |                                                               |                                                              |                                                           |                           |
| None                                              | 17,379 (44.8)                                                 | 11,252 (48.0)                                                | 6127 (39.9)                                               | <0.001                    |
| 1-5                                               | 10,509 (27.1)                                                 | 6270 (26.7)                                                  | 4239 (27.6)                                               |                           |
| 6-10                                              | 3709 (9.6)                                                    | 2129 (9.1)                                                   | 1580 (10.3)                                               |                           |
| 11-20                                             | 3002 (7.7)                                                    | 1659 (7.1)                                                   | 1343 (8.7)                                                |                           |
| 21-50                                             | 2304 (5.9)                                                    | 1188 (5.1)                                                   | 1116 (7.3)                                                |                           |
| 50+                                               | 1929 (5.0)                                                    | 961 (4.1)                                                    | 968 (6.3)                                                 |                           |
| <b>Physician skin checks in past 3 years</b>      |                                                               |                                                              |                                                           |                           |
| Never                                             | 10,598 (27.3)                                                 | 6909 (29.5)                                                  | 3689 (24.0)                                               | <0.001                    |
| Once                                              | 11,798 (30.4)                                                 | 7208 (30.7)                                                  | 4590 (29.9)                                               |                           |
| 2-5 times                                         | 13,943 (35.9)                                                 | 7957 (33.9)                                                  | 5986 (38.9)                                               |                           |
| More than 5 times                                 | 2493 (6.4)                                                    | 1385 (5.9)                                                   | 1108 (7.2)                                                |                           |

<sup>1</sup>P-value for significant difference in mean values (Ryan-Einot-Gabriel-Welsch multiple range test).

**Table S4.** Measures of sun exposure and risk of first invasive melanoma, stratified by body site of melanoma<sup>1</sup>.

| Variables                                                   | HR (95% CI) <sup>2</sup> |                        |                    |                    | P-interaction |
|-------------------------------------------------------------|--------------------------|------------------------|--------------------|--------------------|---------------|
|                                                             | Trunk (n=110)            | Head/neck (n=48)       | Upper limbs (n=83) | Lower limbs (n=64) |               |
| <b>Born in Australia</b>                                    |                          |                        |                    |                    |               |
| No                                                          | Reference                | Reference              | Reference          | Reference          |               |
| Yes                                                         | 1.48 (0.86-2.54)         | 1.15 (0.54-2.48)       | 1.14 (0.64-2.02)   | 3.27 (1.19-8.99)   | 0.04          |
| <b>Latitude of birth</b>                                    |                          |                        |                    |                    |               |
| ≥45° S/N                                                    | Reference                | Reference              | Reference          | Reference          |               |
| <45° S/N                                                    | 1.91 (0.93-3.92)         | 1.62 (0.58-4.56)       | 1.07 (0.56-2.07)   | 2.04 (0.74-5.61)   | 0.008         |
| <b>Region of Australia lived longest up to age 20 years</b> |                          |                        |                    |                    |               |
| Southern region                                             | Reference                | Reference              | Reference          | Reference          |               |
| Central region                                              | 0.89 (0.59-1.35)         | 1.18 (0.57-2.43)       | 1.45 (0.87-2.41)   | 1.31 (0.77-2.26)   |               |
| Northern region                                             | 0.59 (0.30-1.14)         | 1.76 (0.76-4.07)       | 0.96 (0.45-2.03)   | 0.51 (0.19-1.36)   | <0.001        |
| <b>Region of Australia lived longest over lifetime</b>      |                          |                        |                    |                    |               |
| Southern region                                             | Reference                | Reference              | Reference          | Reference          |               |
| Central region                                              | 0.84 (0.55-1.30)         | 1.09 (0.54-2.18)       | 1.38 (0.79-2.41)   | 1.30 (0.70-2.42)   |               |
| Northern region                                             | 0.61 (0.32-1.15)         | 0.83 (0.32-2.15)       | 0.91 (0.42-1.97)   | 0.69 (0.28-1.73)   | <0.001        |
| <b>Age moved to Australia</b>                               |                          |                        |                    |                    |               |
| Born in Australia                                           | Reference                | Reference              | Reference          | Reference          |               |
| 1-10 years                                                  | 0.86 (0.35-2.11)         | 0.41 (0.06-3.00)       | 1.45 (0.63-3.33)   | -                  |               |
| 11-20 years                                                 | 1.14 (0.42-3.11)         | 1.35 (0.33-5.60)       | 1.16 (0.36-3.69)   | 1.40 (0.44-4.48)   |               |
| 20+ years                                                   | 0.47 (0.21-1.08)         | 0.95 (0.37-2.46)       | 0.55 (0.22-1.36)   | 0.14 (0.02-0.98)   | <0.001        |
| <b>Sunburns as a child (less than 10 years)</b>             |                          |                        |                    |                    |               |
| Never                                                       | Reference                | Reference              | Reference          | Reference          |               |
| 1-5 times                                                   | 1.16 (0.66-2.03)         | 1.04 (0.45-2.42)       | 1.25 (0.65-2.38)   | 0.89 (0.47-1.69)   |               |
| 6-10 times                                                  | 1.06 (0.53-2.11)         | 1.18 (0.45-3.12)       | 1.01 (0.43-2.34)   | 0.53 (0.21-1.33)   |               |
| 11-20 times                                                 | 1.39 (0.65-2.97)         | 0.41 (0.09-2.00)       | 1.60 (0.68-3.75)   | 0.38 (0.11-1.37)   |               |
| 21-50 times                                                 | 1.18 (0.42-3.26)         | 0.78 (0.16-3.72)       | 1.53 (0.53-4.49)   | 0.73 (0.21-2.58)   |               |
| >50 times                                                   | 1.08 (0.24-4.78)         | 1.76 (0.36-8.66)       | 3.36 (1.16-9.71)   | 1.13 (0.25-5.18)   | 0.007         |
| <b>Sunburns as a youth (10-20 years old)</b>                |                          |                        |                    |                    |               |
| Never                                                       | Reference                | Reference <sup>3</sup> | Reference          | Reference          |               |
| 1-5 times                                                   | 2.21 (0.54-9.07)         | -                      | 0.91 (0.29-2.86)   | 1.44 (0.35-6.01)   |               |

| Variables                                                             | HR (95% CI) <sup>2</sup> |                  |                    |                    | P-interaction |
|-----------------------------------------------------------------------|--------------------------|------------------|--------------------|--------------------|---------------|
|                                                                       | Trunk (n=110)            | Head/neck (n=48) | Upper limbs (n=83) | Lower limbs (n=64) |               |
| 6-10 times                                                            | 2.69 (0.64-11.27)        | -                | 1.20 (0.38-3.85)   | 1.33 (0.31-5.69)   |               |
| 11-20 times                                                           | 3.58 (0.85-15.07)        | -                | 0.90 (0.26-3.12)   | 0.57 (0.11-2.89)   |               |
| 21-50 times                                                           | 1.65 (0.32-8.59)         | -                | 1.80 (0.52-6.29)   | 1.00 (0.18-5.49)   |               |
| >50 times                                                             | 3.32 (0.60-18.49)        | -                | 3.26 (0.87-12.22)  | 2.02 (0.33-12.31)  | <0.001        |
| <b>Sunburns as an adult (more than 20 years old)</b>                  |                          |                  |                    |                    |               |
| Never                                                                 | Reference                | Reference        | Reference          | Reference          |               |
| 1-5 times                                                             | 2.59 (1.18-5.66)         | 1.12 (0.47-2.66) | 1.12 (0.58-2.17)   | 1.07 (0.53-2.20)   |               |
| 6-10 times                                                            | 3.42 (1.48-7.89)         | 1.84 (0.71-4.81) | 0.66 (0.26-1.68)   | 0.93 (0.38-2.26)   |               |
| 11-20 times                                                           | 2.17 (0.81-5.82)         | 0.57 (0.07-4.83) | 1.51 (0.63-3.62)   | 0.98 (0.33-2.87)   |               |
| 21-50 times                                                           | 3.26 (1.09-9.76)         | 0.53 (0.06-4.51) | 3.68 (1.58-8.57)   | 1.71 (0.51-5.69)   |               |
| >50 times                                                             | 3.97 (1.01-15.56)        | -                | 1.90 (0.42-8.58)   | 1.18 (0.15-9.31)   | <0.001        |
| <b>Cumulative sun exposure<sup>4</sup></b>                            |                          |                  |                    |                    |               |
| Q1                                                                    | Reference                | Reference        | Reference          | Reference          |               |
| Q2                                                                    | 1.38 (0.71-2.70)         | 1.14 (0.40-3.24) | 0.63 (0.34-1.15)   | 0.68 (0.33-1.40)   |               |
| Q3                                                                    | 1.45 (0.76-2.78)         | 1.81 (0.70-4.71) | 0.58 (0.31-1.09)   | 0.53 (0.24-1.18)   |               |
| Q4                                                                    | 1.13 (0.59-2.17)         | 1.38 (0.51-3.68) | 0.50 (0.26-0.93)   | 1.26 (0.64-2.47)   | 0.89          |
| <b>Average number of hours in the sun on weekdays<sup>1</sup></b>     |                          |                  |                    |                    |               |
| Q1                                                                    | Reference                | Reference        | Reference          | Reference          |               |
| Q2                                                                    | 1.49 (0.79-2.83)         | 1.78 (0.62-5.12) | 0.70 (0.39-1.26)   | 0.93 (0.47-1.86)   |               |
| Q3                                                                    | 1.46 (0.78-2.73)         | 1.98 (0.73-5.41) | 0.51 (0.27-0.97)   | 0.67 (0.32-1.39)   |               |
| Q4                                                                    | 1.23 (0.66-2.27)         | 2.01 (0.74-5.41) | 0.53 (0.28-0.99)   | 0.89 (0.43-1.83)   | 0.43          |
| <b>Average number of hours in the sun on weekend days<sup>4</sup></b> |                          |                  |                    |                    |               |
| Q1                                                                    | Reference                | Reference        | Reference          | Reference          |               |
| Q2                                                                    | 1.99 (1.10-3.62)         | 0.89 (0.34-2.32) | 0.73 (0.39-1.37)   | 0.92 (0.45-1.88)   |               |
| Q3                                                                    | 1.17 (0.62-2.22)         | 1.02 (0.43-2.40) | 0.79 (0.43-1.44)   | 1.01 (0.50-2.03)   |               |
| Q4                                                                    | 1.49 (0.80-2.79)         | 1.30 (0.55-3.11) | 0.76 (0.39-1.49)   | 1.05 (0.49-2.24)   | 0.22          |
| <b>Sunbed use</b>                                                     |                          |                  |                    |                    |               |
| Never                                                                 | Reference                | Reference        | Reference          | Reference          |               |
| Ever                                                                  | 1.28 (0.63-2.57)         | 1.30 (0.47-3.57) | 1.74 (0.90-3.37)   | 1.15 (0.53-2.51)   | 0.65          |
| <b>Number of skin cancers excised</b>                                 |                          |                  |                    |                    |               |
| None                                                                  | Reference                | Reference        | Reference          | Reference          |               |
| 1                                                                     | 1.17 (0.63-2.19)         | 2.22 (1.01-4.85) | 2.89 (1.51-5.53)   | 0.57 (0.23-1.45)   |               |
| 2-10                                                                  | 1.97 (1.26-3.07)         | 1.86 (0.89-3.88) | 3.31 (1.87-5.86)   | 1.19 (0.66-2.15)   |               |
| 10-20                                                                 | 2.42 (1.05-5.56)         | 1.46 (0.30-7.13) | 5.60 (2.36-13.26)  | 1.62 (0.49-5.39)   |               |
| 20+                                                                   | 3.40 (1.50-7.69)         | 1.82 (0.41-8.02) | 0.95 (0.12-7.52)   | 3.10 (1.06-9.08)   | <0.001        |

| Variables                                         | HR (95% CI) <sup>2</sup> |                  |                    |                    | P-interaction |
|---------------------------------------------------|--------------------------|------------------|--------------------|--------------------|---------------|
|                                                   | Trunk (n=110)            | Head/neck (n=48) | Upper limbs (n=83) | Lower limbs (n=64) |               |
| <b>Number of actinic lesions burnt/frozen off</b> |                          |                  |                    |                    |               |
| None                                              | Reference                | Reference        | Reference          | Reference          |               |
| 1-5                                               | 1.44 (0.84-2.45)         | 1.78 (0.78-4.09) | 3.21 (1.52-6.80)   | 1.13 (0.57-2.21)   |               |
| 6-10                                              | 2.13 (1.15-5.41)         | 1.74 (0.60-5.07) | 4.46 (1.90-10.47)  | 1.06 (0.40-2.80)   |               |
| 11-20                                             | 1.56 (0.76-3.18)         | 1.30 (0.39-4.37) | 6.49 (2.89-14.56)  | 2.59 (1.25-5.36)   |               |
| 21-50                                             | 2.19 (1.13-4.24)         | 2.24 (0.71-7.02) | 6.38 (2.73-14.89)  | 3.52 (1.67-7.40)   |               |
| 50+                                               | 2.40 (1.15-3.98)         | 2.44 (0.82-7.27) | 6.60 (2.70-16.13)  | 1.77 (0.62-5.06)   | <0.001        |

<sup>1</sup>11 melanoma cases had missing information on site.

<sup>2</sup>Born in Australia, latitude of birth, region of Australia lived longest (as a child; lifetime) adjusted for age and sex.

All other variables adjusted for age, sex, hair colour and tanning ability.

<sup>3</sup>Zero cells in referent category.

<sup>4</sup>Q - Quartile

**Table S5.** Measures of sun exposure and risk of invasive melanoma, stratified by sex.

| Variables                                                   | HR (95% CI) <sup>1</sup> |                   | P-interaction |
|-------------------------------------------------------------|--------------------------|-------------------|---------------|
|                                                             | Women (n=136)            | Men (n=180)       |               |
| <b>Born in Australia</b>                                    |                          |                   |               |
| No                                                          | Reference                | Reference         |               |
| Yes                                                         | 2.06 (1.17-3.63)         | 1.29 (0.86-1.93)  | 0.17          |
| <b>Latitude of birth</b>                                    |                          |                   |               |
| ≥45° S/N                                                    | Reference                | Reference         |               |
| <45° S/N                                                    | 1.89 (0.97-3.70)         | 1.48 (0.90-2.44)  | 0.54          |
| <b>Region of Australia lived longest up to age 20 years</b> |                          |                   |               |
| Southern region                                             | Reference                | Reference         |               |
| Central region                                              | 1.15 (0.78-1.69)         | 1.12 (0.80-1.56)  |               |
| Northern region                                             | 0.62 (0.33-1.15)         | 0.88 (0.54-1.43)  | 0.76          |
| <b>Region of Australia lived longest over lifetime</b>      |                          |                   |               |
| Southern region                                             | Reference                | Reference         |               |
| Central region                                              | 1.07 (0.71-1.61)         | 1.05 (0.74-1.50)  |               |
| Northern region                                             | 0.63 (0.34-1.16)         | 0.76 (0.47-1.25)  | 0.79          |
| <b>Age moved to Australia</b>                               |                          |                   |               |
| Born in Australia                                           | Reference                | Reference         |               |
| 1-10 years                                                  | 0.42 (0.13-1.33)         | 0.95 (0.49-1.86)  |               |
| 11-20 years                                                 | 0.66 (0.21-2.08)         | 1.60 (0.81-3.15)  |               |
| 20+ years                                                   | 0.47 (0.22-1.00)         | 0.48 (0.26-0.92)  | 0.37          |
| <b>Sunburns as a child (less than 10 years)</b>             |                          |                   |               |
| Never                                                       | Reference                | Reference         |               |
| 1-5 times                                                   | 1.21 (0.77-1.913)        | 0.93 (0.60-1.43)  |               |
| 6-10 times                                                  | 1.05 (0.59-1.88)         | 0.84 (0.49-1.44)  |               |
| 11-20 times                                                 | 0.91 (0.43-1.92)         | 0.95 (0.51-1.75)  |               |
| 21-50 times                                                 | 0.38 (0.09-1.63)         | 1.35 (0.69-2.65)  |               |
| >50 times                                                   | 1.83 (0.70-4.82)         | 1.78 (0.76-4.19)  | 0.40          |
| <b>Sunburns as a youth (10-20 years old)</b>                |                          |                   |               |
| Never                                                       | Reference                | Reference         |               |
| 1-5 times                                                   | 1.56 (0.52-4.71)         | 1.64 (0.66-4.08)  |               |
| 6-10 times                                                  | 2.05 (0.67-6.28)         | 1.58 (0.62-4.01)  |               |
| 11-20 times                                                 | 1.18 (0.36-3.84)         | 1.96 (0.76-5.04)  |               |
| 21-50 times                                                 | 1.21 (0.33-4.46)         | 1.71 (0.60-4.84)  |               |
| >50 times                                                   | 2.36 (0.59-9.46)         | 3.74 (1.29-10.87) | 0.43          |
| <b>Sunburns as an adult (more than 20 years old)</b>        |                          |                   |               |
| Never                                                       | Reference                | Reference         |               |
| 1-5 times                                                   | 1.41 (0.85-2.33)         | 1.35 (0.81-2.23)  |               |
| 6-10 times                                                  | 1.17 (0.61-2.24)         | 1.70 (0.97-2.979) |               |
| 11-20 times                                                 | 1.08 (0.47-2.45)         | 1.41 (0.74-2.70)  |               |
| 21-50 times                                                 | 2.00 (0.80-5.01)         | 2.62 (1.33-5.13)  |               |
| >50 times                                                   | 2.09 (0.49-8.98)         | 1.56 (0.52-4.62)  | 0.67          |
| <b>Cumulative sun exposure<sup>2</sup></b>                  |                          |                   |               |
| Q1                                                          | Reference                | Reference         |               |
| Q2                                                          | 0.76 (0.49-1.18)         | 1.13 (0.62-2.04)  |               |
| Q3                                                          | 0.78 (0.49-1.25)         | 1.34 (0.77-2.33)  |               |

| Variables                                                             | HR (95% CI) <sup>1</sup> |                  | P-interaction |
|-----------------------------------------------------------------------|--------------------------|------------------|---------------|
|                                                                       | Women (n=136)            | Men (n=180)      |               |
| Q4                                                                    | 0.62 (0.32-1.18)         | 1.20 (0.70-2.03) | 0.20          |
| <b>Average number of hours in the sun on weekdays<sup>2</sup></b>     |                          |                  |               |
| Q1                                                                    | Reference                | Reference        |               |
| Q2                                                                    | 0.86 (0.56-1.32)         | 1.38 (0.79-2.42) |               |
| Q3                                                                    | 0.74 (0.47-1.18)         | 1.36 (0.80-2.29) |               |
| Q4                                                                    | 0.55 (0.27-1.09)         | 1.32 (0.80-2.17) | 0.12          |
| <b>Average number of hours in the sun on weekend days<sup>2</sup></b> |                          |                  |               |
| Q1                                                                    | Reference                | Reference        |               |
| Q2                                                                    | 1.05 (0.68-1.61)         | 1.21 (0.70-2.07) |               |
| Q3                                                                    | 0.67 (0.39-1.14)         | 1.28 (0.77-2.13) |               |
| Q4                                                                    | 1.01 (0.57-1.80)         | 1.22 (0.74-2.02) | 0.37          |
| <b>Sunbed use</b>                                                     |                          |                  |               |
| Never                                                                 | Reference                | Reference        |               |
| Ever                                                                  | 1.47 (0.93-2.34)         | 1.02 (0.50-2.08) | 0.36          |
| <b>Number of skin cancers excised</b>                                 |                          |                  |               |
| None                                                                  | Reference                | Reference        |               |
| 1                                                                     | 1.67 (1.04-2.67)         | 1.24 (0.75-2.06) |               |
| 2-10                                                                  | 1.86 (1.23-2.82)         | 2.16 (1.52-3.08) |               |
| 10-20                                                                 | 3.35 (1.56-7.20)         | 2.85 (1.56-5.20) |               |
| 20+                                                                   | 0.74 (0.11-5.28)         | 3.20 (1.71-6.00) | 0.49          |
| <b>Number of actinic lesions burnt/frozen off</b>                     |                          |                  |               |
| None                                                                  | Reference                | Reference        |               |
| 1-5                                                                   | 1.97 (1.22-3.20)         | 1.56 (1.01-2.41) |               |
| 6-10                                                                  | 2.33 (1.25-4.34)         | 1.96 (1.17-3.29) |               |
| 11-20                                                                 | 3.35 (1.85-6.06)         | 2.00 (1.18-3.28) |               |
| 21-50                                                                 | 3.74 (1.97-7.10)         | 2.76 (1.68-4.52) |               |
| 50+                                                                   | 3.73 (1.85-7.50)         | 2.86 (1.70-4.82) | 0.92          |

<sup>1</sup>Born in Australia, latitude of birth, region of Australia lived longest (as a child; lifetime) adjusted for age and sex.

All other variables adjusted for age, sex, hair colour and tanning ability.

<sup>2</sup>Q - Quartile

**Table S6.** Measures of sun exposure and risk of first melanoma (invasive or *in situ*).

| Variables                                                   | Melanoma (invasive or <i>in situ</i> ) |             | HR (95%CI) <sup>1</sup> |
|-------------------------------------------------------------|----------------------------------------|-------------|-------------------------|
|                                                             | No (n=38,050)                          | Yes (n=782) |                         |
|                                                             | n (%)                                  | n (%)       |                         |
| <b>Born in Australia</b>                                    |                                        |             |                         |
| No                                                          | 31,334 (82.4)                          | 675 (86.3)  | Reference               |
| Yes                                                         | 6716 (17.7)                            | 107 (11.7)  | 1.43 (1.17-1.76)        |
| <b>Latitude of birth</b>                                    |                                        |             |                         |
| ≥45° S/N                                                    | 4462 (11.7)                            | 67 (8.6)    | Reference               |
| <45° S/N                                                    | 33,588 (88.3)                          | 715 (91.4)  | 1.54 (1.20-1.98)        |
| <b>Region of Australia lived longest up to age 20 years</b> |                                        |             |                         |
| Southern region                                             | 11,502 (33.8)                          | 245 (33.8)  | Reference               |
| Central region                                              | 16,813 (49.4)                          | 379 (52.3)  | 1.10 (0.93-1.29)        |
| Northern region                                             | 5749 (16.9)                            | 101 (13.9)  | 0.87 (0.69-1.10)        |
| <b>Region of Australia lived longest over lifetime</b>      |                                        |             |                         |
| Southern region                                             | 8677 (22.8)                            | 173 (22.1)  | Reference               |
| Central region                                              | 22,602 (59.4)                          | 499 (63.8)  | 1.12 (0.95-1.34)        |
| Northern region                                             | 6771 (17.8)                            | 110 (14.1)  | 0.83 (0.65-1.05)        |
| <b>Age moved to Australia</b>                               |                                        |             |                         |
| Born in Australia                                           | 31,374 (82.5)                          | 675 (86.3)  | Reference               |
| 1-10 years                                                  | 1856 (4.9)                             | 30 (3.8)    | 0.74 (0.51-1.07)        |
| 11-20 years                                                 | 1079 (2.8)                             | 25 (3.2)    | 1.02 (0.68-1.52)        |
| 20+ years                                                   | 3741 (9.8)                             | 52 (6.7)    | 0.60 (0.45-0.79)        |
| <b>Sunburns as a child (less than 10 years)</b>             |                                        |             |                         |
| Never                                                       | 8006 (21.0)                            | 133 (17.0)  | Reference               |
| 1-5 times                                                   | 17,380 (45.7)                          | 351 (44.9)  | 1.08 (0.88-1.33)        |
| 6-10 times                                                  | 6635 (17.4)                            | 151 (19.3)  | 1.18 (0.92-1.51)        |
| 11-20 times                                                 | 3585 (9.4)                             | 80 (10.2)   | 1.22 (0.91-1.63)        |
| 21-50 times                                                 | 1720 (4.5)                             | 43 (5.5)    | 1.25 (0.88-1.78)        |
| >50 times                                                   | 724 (1.9)                              | 24 (3.1)    | 1.64 (1.05-2.57)        |
| <b>Sunburns as a youth (10-20 years old)</b>                |                                        |             |                         |
| Never                                                       | 1775 (2.7)                             | 22 (2.8)    | Reference               |
| 1-5 times                                                   | 16,615 (43.7)                          | 311 (39.8)  | 1.56 (1.01-2.42)        |
| 6-10 times                                                  | 9446 (24.8)                            | 216 (27.6)  | 1.96 (1.26-3.04)        |
| 11-20 times                                                 | 6329 (16.6)                            | 140 (17.9)  | 1.85 (1.17-2.91)        |
| 21-50 times                                                 | 2849 (7.5)                             | 58 (7.4)    | 1.67 (1.01-2.74)        |
| >50 times                                                   | 1036 (2.7)                             | 35 (4.5)    | 2.68 (1.56-4.59)        |
| <b>Sunburns as an adult (more than 20 years old)</b>        |                                        |             |                         |
| Never                                                       | 6160 (16.2)                            | 111 (14.2)  | Reference               |
| 1-5 times                                                   | 20,236 (53.2)                          | 389 (49.7)  | 1.21 (0.97-1.52)        |
| 6-10 times                                                  | 6293 (16.5)                            | 160 (20.5)  | 1.56 (1.21-2.00)        |
| 11-20 times                                                 | 3374 (8.9)                             | 63 (8.1)    | 1.12 (0.81-1.54)        |
| 21-50 times                                                 | 1438 (3.8)                             | 46 (5.9)    | 1.81 (1.27-2.58)        |
| >50 times                                                   | 551 (1.5)                              | 13 (1.7)    | 1.32 (0.74-2.35)        |
| <b>Cumulative sun exposure<sup>2</sup></b>                  |                                        |             |                         |

| Variables                                                             | Melanoma (invasive or <i>in situ</i> ) |             | HR (95%CI) <sup>1</sup> |
|-----------------------------------------------------------------------|----------------------------------------|-------------|-------------------------|
|                                                                       | No (n=38,050)                          | Yes (n=782) |                         |
|                                                                       | n (%)                                  | n (%)       |                         |
| Q1                                                                    | 9228 (24.3)                            | 185 (23.7)  | Reference               |
| Q2                                                                    | 9569 (25.2)                            | 172 (22.0)  | 0.82 (0.66-1.02)        |
| Q3                                                                    | 9617 (25.3)                            | 196 (25.1)  | 0.82 (0.66-1.01)        |
| Q4                                                                    | 9636 (25.3)                            | 229 (29.3)  | 0.81 (0.65-1.00)        |
| <b>Average number of hours in the sun on weekdays<sup>2</sup></b>     |                                        |             |                         |
| Q1                                                                    | 8920 (23.4)                            | 184 (23.5)  | Reference               |
| Q2                                                                    | 9333 (24.5)                            | 186 (23.8)  | 0.96 (0.77-1.19)        |
| Q3                                                                    | 10,032 (26.4)                          | 204 (26.1)  | 0.89 (0.72-1.10)        |
| Q4                                                                    | 9765 (25.7)                            | 208 (26.6)  | 0.83 (0.67-1.02)        |
| <b>Average number of hours in the sun on weekend days<sup>2</sup></b> |                                        |             |                         |
| Q1                                                                    | 9589 (25.2)                            | 182 (23.3)  | Reference               |
| Q2                                                                    | 9724 (24.2)                            | 217 (27.8)  | 1.17 (0.95-1.44)        |
| Q3                                                                    | 9652 (25.4)                            | 197 (25.2)  | 1.00 (0.81-1.24)        |
| Q4                                                                    | 9085 (23.9)                            | 186 (23.8)  | 0.97 (0.78-1.22)        |
| <b>Sunbed use</b>                                                     |                                        |             |                         |
| Never                                                                 | 33,976 (89.3)                          | 710 (90.8)  | Reference               |
| Ever                                                                  | 4074 (10.7)                            | 72 (9.2)    | 1.18 (0.92-1.51)        |
| <b>Number of skin cancers excised</b>                                 |                                        |             |                         |
| None                                                                  | 23,366 (61.4)                          | 292 (37.3)  | Reference               |
| 1                                                                     | 5291 (13.9)                            | 122 (15.6)  | 1.71 (1.38-2.11)        |
| 2-10                                                                  | 7875 (20.7)                            | 286 (36.6)  | 2.38 (2.00-2.82)        |
| 10-20                                                                 | 917 (2.4)                              | 46 (5.9)    | 2.84 (2.07-3.91)        |
| 20+                                                                   | 601 (1.6)                              | 36 (4.6)    | 3.11 (2.16-4.47)        |
| <b>Number of actinic lesions burnt/frozen off</b>                     |                                        |             |                         |
| None                                                                  | 17,187 (45.2)                          | 192 (24.6)  | Reference               |
| 1-5                                                                   | 10,317 (27.1)                          | 192 (24.6)  | 1.55 (1.27-1.90)        |
| 6-10                                                                  | 3595 (9.5)                             | 114 (14.6)  | 2.37 (1.87-3.019)       |
| 11-20                                                                 | 2904 (9.5)                             | 98 (12.5)   | 2.39 (1.87-3.07)        |
| 21-50                                                                 | 2215 (5.8)                             | 89 (11.4)   | 2.69 (2.08-3.49)        |
| 50+                                                                   | 1832 (4.8)                             | 97 (12.4)   | 3.23 (2.48-4.21)        |

<sup>1</sup>Born in Australia, latitude of birth, region of Australia lived longest (as a child; lifetime) adjusted for age.

All other variables adjusted for age, hair colour and tanning ability.

<sup>2</sup>Q - Quartile



## REFERENCES

1. Law MH, Bishop DT, Lee JE, et al. Genome-wide meta-analysis identifies five new susceptibility loci for cutaneous malignant melanoma. *Nat Genet* 2015; **47**(9): 987-95.
2. Chang CC, Chow CC, Tellier LC, Vattikuti S, Purcell SM, Lee JJ. Second-generation PLINK: rising to the challenge of larger and richer datasets. *GigaScience* 2015; **4**: 7.
3. Duffy DL, Zhao ZZ, Sturm RA, Hayward NK, Martin NG, Montgomery GW. Multiple pigmentation gene polymorphisms account for a substantial proportion of risk of cutaneous malignant melanoma. *J Invest Dermatol* 2010; **130**(2): 520-8.
4. R Core Team. R: A Language and Environment for Statistical Computing. Vienna, Austria; 2014.
5. McCarthy S, Das S, Kretzschmar W, et al. A reference panel of 64,976 haplotypes for genotype imputation. *Nat Genet* 2016; **48**(10): 1279-83.
